# Supplementary material for: Changes of the Gastric Mucosal Microbiome Associated With Histological Stages of Gastric Carcinogenesis
Source: Front Microbiol. 2020 May 29;11:997. doi: 10.3389/fmicb.2020.00997 (PMC7272699; doi:10.3389/fmicb.2020.00997)
Supplement: Supplementary file 6 [file Table_4.xlsx]

## Sheet: Sheet1
Supplementary Table S4. Mucosal bacterial taxa are significantly different across the gastric histological types
	P Group	FDR Group	P adjusted Group	F Value Group	P (Tukeys) CG-HC	P (Tukeys) IM-HC	P (Tukeys) IN-HC	P (Tukeys) GC-HC	P (Tukeys) IM-CG	P (Tukeys) IN-CG	P (Tukeys) GC-CG	P (Tukeys) IN-IM	P (Tukeys) GC-IM	P (Tukeys) GC-IN	CG mean	GC mean	HC mean	IN mean	IM mean
Phylum
WS3	0	0	0	55	1.2e-12	1.2e-12	1.1e-12	1.1e-12	0.52	0.14	0.0048	0.96	0.29	0.65	0.028	0.0067	0.081	0.013	0.017
Elusimicrobia	0	0	0	46	0.00015	1e-09	1.1e-12	1.1e-12	0.37	3.6e-06	6e-09	0.0038	2e-05	0.69	0.017	0.0019	0.029	0.0045	0.013
Acidobacteria	3.9e-20	3.4e-19	9.4e-19	29	3.4e-08	0.31	0.078	0.0088	0.00024	1.2e-12	1.2e-12	6.3e-05	1.5e-06	0.94	2.28	0.36	0.96	0.49	1.35
OP8	5.4e-20	3.5e-19	1.2e-18	28	1.8e-08	1.5e-06	0.95	0.49	0.74	4.5e-11	1.2e-12	4.6e-09	9.4e-12	0.87	0.035	0.0024	0.0082	0.0056	0.03
Armatimonadetes	1.3e-19	6.8e-19	2.9e-18	28	1	7.7e-05	1.5e-09	1.2e-12	0.0015	4e-07	5.1e-12	0.44	0.0019	0.18	0.042	0.0075	0.044	0.016	0.023
Nitrospirae	9.5e-18	4.1e-17	2e-16	25	0.0094	6.1e-08	6.7e-10	1.2e-12	0.17	0.063	6.8e-06	1	0.034	0.04	0.14	0.044	0.21	0.09	0.096
Gemmatimonadetes	5.5e-15	2e-14	1.1e-13	21	0.00011	0.29	0.28	0.0035	0.068	2.7e-09	1.3e-12	0.00061	3e-07	0.44	0.35	0.074	0.19	0.12	0.25
Firmicutes	9.6e-14	3.1e-13	1.8e-12	19	0.97	0.97	1.1e-07	1.6e-08	1	3.7e-05	1e-05	5.4e-06	1.1e-06	1	12.11	24.12	10.54	23.69	12.13
Cyanobacteria	1.8e-13	5.2e-13	3.2e-12	18	1.5e-07	5.1e-08	1.5e-09	0.19	1	1	0.00023	1	0.00014	9.7e-06	1.13	7.67	10.69	1.31	1.51
Proteobacteria	1.2e-12	3.1e-12	2e-11	17	0.57	0.081	0.12	0.00014	0.91	0.0019	4.6e-07	6e-06	6.2e-11	0.21	71.39	51.26	65.6	57.65	74.8
Chloroflexi	1.5e-12	3.5e-12	2.4e-11	17	0.3	0.0011	2.6e-06	2.6e-12	0.46	0.052	1.4e-05	0.84	0.0068	0.08	0.22	0.072	0.28	0.14	0.16
AD3	4.8e-08	1e-07	7.2e-07	11	0.87	0.25	0.14	6.7e-08	0.89	0.81	0.00017	1	0.0025	0.0011	0.017	0.0023	0.021	0.013	0.014
Planctomycetes	1.4e-07	2.8e-07	2e-06	10	0.075	8.1e-06	5.8e-07	1.9e-05	0.24	0.14	0.5	1	0.96	0.89	0.18	0.12	0.29	0.089	0.093
Verrucomicrobia	1.8e-07	3.3e-07	2.3e-06	9.8	0.0011	0.7	0.8	0.46	0.058	4.8e-06	2.8e-07	0.099	0.022	0.98	0.51	0.16	0.25	0.18	0.33
WPS2	7e-07	1.2e-06	8.4e-06	9	0.92	1	0.19	0.00021	0.92	0.034	2.3e-05	0.19	0.00025	0.17	0.031	0.006	0.026	0.016	0.026
Actinobacteria	1.5e-06	2.4e-06	1.6e-05	8.6	1	0.5	0.0015	0.55	0.42	0.012	0.8	8.1e-07	0.011	0.073	2.87	3.4	2.75	4.42	1.99
Chlorobi	1e-05	1.5e-05	0.0001	7.4	0.98	0.53	0.14	0.012	0.26	0.56	0.16	0.00083	1.7e-05	0.9	0.05	0.0085	0.062	0.022	0.091
Fusobacteria	0.00034	0.00049	0.0031	5.4	0.9	0.97	0.083	0.0007	1	0.64	0.059	0.34	0.0096	0.54	0.92	1.83	0.6	1.4	0.81
Bacteroidetes	0.00037	0.00051	0.0031	5.3	0.99	0.97	0.065	0.026	0.86	0.28	0.16	0.01	0.0031	1	7.3	10.18	6.74	9.87	5.94
TM7	0.00052	0.00068	0.0036	5.1	1	1	1	0.011	1	0.97	0.0098	0.96	0.0037	0.014	0.05	0.2	0.065	0.078	0.05
SR1	0.0031	0.0038	0.019	4.1	1	1	0.93	0.023	1	0.88	0.028	0.83	0.011	0.12	0.012	0.11	0.02	0.044	0.012
Thermi	0.0046	0.0054	0.023	3.8	0.059	0.14	0.99	0.041	0.99	0.11	1	0.24	1	0.079	0.0059	0.0074	0.019	0.017	0.0083
Crenarchaeota	0.014	0.016	0.056	3.2	1	0.99	0.89	0.25	1	0.98	0.23	1	0.074	0.012	0.043	0.14	0.054	0.014	0.029
Genus
Unclassified Chloracidobacteria	0	0	0	270	1.1e-12	1.1e-12	1.1e-12	1.1e-12	1	1	1	1	1	1	0.00098	0	0.084	0.00027	0.00056
Unclassified 34P16	0	0	0	230	1.1e-12	1.1e-12	1.1e-12	1.1e-12	1	1	1	1	1	1	0.0022	0.00095	0.18	0.0004	0.00074
HB23221	0	0	0	200	1.1e-12	1.1e-12	1.1e-12	1.1e-12	1	0.99	1	0.99	1	1	0	0.00095	0.13	0.0028	0.00019
Unclassified PYR10d3	0	0	0	200	1.1e-12	1.1e-12	1.1e-12	1.1e-12	1	0.98	1	0.98	1	0.99	0	0.00083	0.16	0.004	0
Unclassified Erythrobacteraceae	0	0	0	190	1.1e-12	1.1e-12	1.1e-12	1.1e-12	0.99	0.11	0.091	0.23	0.18	1	0.04	0.01	0.27	0.011	0.034
Unclassified Cyclobacteriaceae	0	0	0	180	1.1e-12	1.1e-12	1.1e-12	1.1e-12	1	1	0.92	1	0.89	0.96	0.0032	0.018	0.37	0.0075	0.003
Unclassified Rhizobiaceae	0	0	0	150	1.1e-12	1.1e-12	1.1e-12	1.1e-12	1	0.5	1	0.36	1	0.33	0.011	0.012	0.27	0.032	0.0098
Sphingobium	0	0	0	150	1.1e-12	1.1e-12	1.1e-12	1.1e-12	1	1	1	1	1	1	0.025	0.0079	1.72	0.011	0.016
Zoogloea	0	0	0	140	1.1e-12	1.1e-12	1.1e-12	1.1e-12	1	1	1	1	1	1	0.0039	0.01	1.35	0.0043	0.011
Magnetospirillum	0	0	0	130	1.1e-12	1.1e-12	1.1e-12	1.1e-12	1	0.99	1	0.99	1	0.98	0	0	0.061	0.0016	0
Sulfurimonas	0	0	0	120	1.1e-12	1.1e-12	1.1e-12	1.1e-12	0.75	0.18	0.19	0.86	0.87	1	0.01	0.0017	0.069	0.0015	0.005
Unclassified mb2424	0	0	0	120	1.1e-12	1.1e-12	1.1e-12	1.1e-12	0.91	0.36	0.074	0.86	0.37	0.91	0.019	0.0063	0.094	0.0099	0.014
Unclassified Alphaproteobacteria	0	0	0	120	1.1e-12	1.1e-12	1.1e-12	1.1e-12	0.86	0.57	0.014	0.99	0.15	0.28	0.13	0.029	0.61	0.082	0.096
HTCC	0	0	0	120	1.1e-12	1.1e-12	1.1e-12	1.1e-12	0.99	0.36	0.98	0.59	1	0.53	0.0017	0.0036	0.059	0.0077	0.0033
Yonghaparkia	0	0	0	120	1.1e-12	1.1e-12	1.1e-12	1.1e-12	1	1	1	1	1	1	0	0.00048	0.05	0.00053	0
Rhodobacter	0	0	0	120	1.1e-12	1.1e-12	1.1e-12	1.1e-12	0.99	1	0.98	0.99	1	0.98	0.019	0.042	0.71	0.022	0.038
Rheinheimera	0	0	0	120	1.1e-12	1.1e-12	1.1e-12	1.1e-12	0.96	0.8	1	0.99	0.93	0.68	0.01	0.01	0.27	0.027	0.021
Aquabacterium	0	0	0	110	1.1e-12	1.1e-12	1.1e-12	1.1e-12	1	1	1	1	1	1	0.02	0.013	0.76	0.0053	0.02
Tepidimonas	0	0	0	110	1.1e-12	1.1e-12	1.1e-12	1.1e-12	1	0.99	0.97	0.94	1	0.72	0.012	0.021	0.24	0.0064	0.016
Perlucidibaca	0	0	0	110	1.1e-12	1.1e-12	1.1e-12	1.1e-12	1	0.97	0.93	0.94	0.88	1	0.0032	0.00095	0.047	0.0013	0.0033
Hydrogenophaga	0	0	0	110	1.1e-12	1.1e-12	1.1e-12	1.1e-12	1	1	1	0.97	0.92	1	0.02	0.01	0.46	0.015	0.031
Mesorhizobium	0	0	0	110	1.1e-12	1.1e-12	1	1	0.018	1.1e-12	1.1e-12	1.1e-12	1.1e-12	1	0.29	0.0045	0.0068	0.0092	0.22
Unclassified Rhodocyclaceae	0	0	0	100	1.1e-12	1.1e-12	1.1e-12	1.1e-12	1	1	0.45	0.97	0.17	0.43	0.051	0.022	0.32	0.047	0.058
Vogesella	0	0	0	99	1.1e-12	1.1e-12	1.1e-12	1.1e-12	1	1	1	1	1	1	0.0068	0.0027	0.61	0.00093	0.012
Legionella	0	0	0	98	1.1e-12	1.1e-12	1.1e-12	1.1e-12	1	0.28	0.13	0.43	0.22	0.99	0.008	0.0013	0.047	0.0023	0.0069
Unclassified Pseudomonadaceae	0	0	0	98	1.1e-12	1.1e-12	1.1e-12	1.1e-12	1	0.9	0.65	0.98	0.82	0.98	0.15	0.037	1.39	0.075	0.12
Mycoplana	0	0	0	92	1.1e-12	1.1e-12	1.1e-12	1.1e-12	0.99	0.76	0.72	0.92	0.9	1	0.03	0.011	0.24	0.012	0.024
Unclassified Rickettsiales	0	0	0	92	1.1e-12	1.1e-12	1.1e-12	1.1e-12	0.82	0.66	0.12	1	0.66	0.73	0.012	0.0029	0.061	0.0067	0.0074
Acidaminobacter	0	0	0	92	1.1e-12	1.1e-12	1.1e-12	1.1e-12	1	1	1	1	1	1	0	0.00024	0.063	0.00013	0
Bdellovibrio	0	0	0	92	1.1e-12	1.1e-12	1.1e-12	1.1e-12	1	0.15	0.054	0.14	0.047	0.99	0.01	0.0012	0.053	0.0024	0.0096
Unclassified Sphingomonadaceae	0	0	0	90	1.2e-12	1.1e-12	1.1e-12	1.1e-12	0.9	0.0019	9.8e-05	0.021	0.0014	0.93	0.17	0.06	0.44	0.075	0.14
Limnohabitans	0	0	0	86	1.2e-12	0.00019	1.1e-12	1.1e-12	0.00037	3.5e-05	4.3e-06	1.2e-12	1.2e-12	0.99	0.2	0.015	0.51	0.028	0.36
Unclassified BD73	0	0	0	86	1.1e-12	1.1e-12	1.1e-12	1.1e-12	1	1	1	1	1	1	0.0071	0.0011	0.38	0.0017	0.0067
Unclassified Pseudanabaenaceae	0	0	0	85	1.1e-12	1.1e-12	1.1e-12	1.1e-12	1	1	1	1	1	1	0.00024	0.00083	0.082	0.0004	0
Unclassified Aeromonadaceae	0	0	0	84	1.1e-12	1.1e-12	1.1e-12	1.1e-12	1	0.63	0.98	0.44	1	0.14	0.08	0.034	1.33	0.2	0.065
Thauera	0	0	0	84	1.1e-12	1.1e-12	1.1e-12	1.1e-12	1	0.058	0.097	0.059	0.1	1	0.031	0.0052	0.16	0.0025	0.029
Dechloromonas	0	0	0	80	1.1e-12	1.1e-12	1.1e-12	1.1e-12	0.5	0.29	0.038	1	0.74	0.84	0.13	0.029	0.55	0.059	0.069
Acinetobacter	0	0	0	77	1.1e-12	1.1e-12	1.1e-12	1.1e-12	1	9.4e-05	0.74	1.3e-05	0.65	0.00064	0.52	1.24	9.17	3.24	0.5
Fluviicola	0	0	0	75	1.1e-12	1.1e-12	1.1e-12	1.1e-12	0.99	0.99	1	0.88	0.95	1	0.0044	0.0054	0.064	0.0063	0.0024
Z35	0	0	0	74	1.1e-12	1.1e-12	1.1e-12	1.1e-12	1	1	1	1	1	1	0	0.0011	0.11	0.00053	0.00019
Agrobacterium	0	0	0	74	1.1e-12	1.1e-12	1.1e-12	1.1e-12	1	0.6	0.94	0.54	0.91	0.061	0.092	0.037	1.06	0.2	0.094
Unclassified Pasteurellales	0	0	0	71	1.3e-12	1.1e-12	0.87	1	0.003	3.5e-12	1.2e-12	1.1e-12	1.1e-12	0.82	0.2	0.00012	0	0.021	0.29
Flavobacterium	0	0	0	71	1.1e-12	1.1e-12	1.1e-12	1.1e-12	1	1	1	1	1	1	0.016	0.017	0.33	0.015	0.011
Unclassified Desulfovibrionaceae	0	0	0	70	9.1e-11	1.1e-12	1	0.87	0.00091	3.5e-12	1.2e-12	1.1e-12	1.1e-12	0.91	0.056	0.00048	0.0062	0.0052	0.084
Tepidibacter	0	0	0	67	1.2e-12	1.2e-12	0.99	0.97	0.62	1.1e-12	1.1e-12	1.2e-12	1.1e-12	1	0.06	0.00012	0.003	0.0008	0.052
Gallionella	0	0	0	65	1.1e-12	1.1e-12	1.1e-12	1.1e-12	1	0.095	0.97	0.041	0.93	0.15	0.00098	0.0062	0.11	0.022	0.00019
Rubrivivax	0	0	0	64	1.1e-12	1.1e-12	1.1e-12	1.1e-12	0.93	0.92	1	0.35	0.72	0.96	0.0068	0.005	0.089	0.0011	0.013
Unclassified Beijerinckiaceae	0	0	0	62	1e-11	2e-06	1.1e-12	1.1e-12	0.092	0.00057	0.00021	2.1e-11	3.2e-12	1	0.024	0.0017	0.066	0.0025	0.038
Unclassified PRR10	0	0	0	58	1.2e-12	1.1e-12	1.1e-12	1.1e-12	0.48	0.8	0.026	0.96	0.69	0.18	0.011	0.00095	0.046	0.0075	0.0052
Hyphomicrobium	0	0	0	53	1.8e-10	1.2e-12	1.1e-12	1.1e-12	0.75	0.062	3.1e-06	0.56	0.00023	0.023	0.028	0.0054	0.061	0.016	0.022
Samsonia	0	0	0	52	4.9e-07	1.1e-12	1	1	8e-05	1.1e-07	3.5e-08	1.1e-12	1.1e-12	1	0.046	0	0.00036	0.00067	0.083
Unclassified Pseudoalteromonadaceae	0	0	0	51	3.6e-09	1.1e-12	0.99	1	0.0057	4.4e-09	2.1e-10	1.1e-12	1.1e-12	0.99	0.36	0.0037	0.002	0.023	0.55
Unclassified Rikenellaceae	0	0	0	51	1.5e-09	1.2e-12	1	0.99	0.048	1.1e-10	6e-12	1.1e-12	1.1e-12	0.99	0.044	0.011	0.012	0.012	0.058
Unclassified Opitutaceae	0	0	0	50	1.3e-05	1.2e-12	1.1e-12	1.1e-12	0.056	6.4e-07	2.2e-08	0.033	0.0044	0.97	0.02	0.0012	0.037	0.0028	0.011
Unclassified Sphingobacteriales	0	0	0	47	9.5e-10	1.2e-12	1.1e-12	1.1e-12	0.23	0.0014	0.0015	0.4	0.44	1	0.041	0.014	0.094	0.013	0.025
Blvii28	0	0	0	47	1.2e-12	1.2e-12	1.1e-12	1.1e-12	1	1	1	1	1	1	0.0059	0.0011	0.64	0.0029	0.0044
Sphingomonas	0	0	0	46	8.1e-07	1.2e-12	0.97	1	0.00039	2.6e-06	3.3e-08	1.2e-12	1.1e-12	0.91	2.88	0.053	0.13	0.39	4.98
Unclassified Comamonadaceae	0	0	0	46	1.2e-12	1.2e-12	1.1e-12	1.1e-12	1	1	0.73	0.99	0.37	0.59	0.38	0.2	1.84	0.38	0.44
Rhodanobacter	0	0	0	45	1.1e-12	2.3e-08	0.99	0.95	9.9e-06	1.1e-12	1.1e-12	3.9e-08	5.2e-08	1	0.15	0.013	0.0054	0.011	0.08
Shewanella	0	0	0	44	1.2e-12	1.2e-12	4.8e-11	0.26	1	0.0059	1.2e-12	0.0069	1.2e-12	1.5e-07	6.1	2.07	1.19	4.41	5.94
Unclassified Syntrophobacteraceae	0	0	0	44	0.12	0.028	7.4e-12	1.2e-12	6.6e-06	1.2e-12	1.1e-12	0.00024	3.5e-07	0.63	0.15	0.029	0.12	0.043	0.088
Methylibium	0	0	0	42	1.2e-12	1.2e-12	1.1e-12	1.1e-12	1	0.86	0.85	0.97	0.96	1	0.087	0.043	0.49	0.044	0.07
Pseudomonas	0	0	0	42	1.2e-12	1.2e-12	1.2e-12	1.1e-12	1	0.74	0.66	0.41	0.84	0.018	0.57	0.29	2.63	0.84	0.49
Rubrobacter	0	0	0	42	1.2e-12	1.2e-12	1.1e-12	1.2e-12	0.7	0.89	0.068	0.99	0.67	0.26	0.0039	0.015	0.051	0.0079	0.0098
Unclassified CL50015	0	0	0	41	6.1e-07	1.2e-12	1.1e-12	1.1e-12	0.039	0.00038	0.00027	0.72	0.7	1	0.016	0.0012	0.038	0.0012	0.0054
Burkholderia	0	0	0	41	1.2e-12	7.4e-10	1	1	0.041	1.2e-12	1.2e-12	2.2e-10	5.5e-12	0.99	0.13	0.02	0.022	0.025	0.094
Unclassified Holophagaceae	0	0	0	41	1.2e-12	1.1e-06	0.92	0.97	0.00085	1.2e-12	1.2e-12	1.3e-09	1.8e-09	1	0.075	0.0023	0.0064	0.00093	0.045
Unclassified Nitrosomonadaceae	0	0	0	41	6.8e-12	1.2e-12	0.84	0.96	1	1.4e-10	1.2e-12	1.8e-12	1.2e-12	0.32	0.03	0.0046	0.0064	0.0092	0.03
Unclassified Acidobacteriaceae	0	0	0	41	1.2e-12	1.5e-07	0.99	1	0.0012	1.2e-12	1.2e-12	1.4e-09	2e-09	1	0.24	0.026	0.03	0.022	0.15
Unclassified Bradyrhizobiaceae	0	0	0	40	1.3e-12	9.7e-12	1	0.99	0.76	1.2e-12	1.2e-12	1.4e-12	1.2e-12	1	1.03	0.021	0.061	0.057	0.89
Unclassified Caulobacteraceae	0	0	0	40	0.74	2.8e-06	1.2e-12	1.2e-12	0.0032	1.2e-11	1.5e-12	0.0012	0.00015	0.99	0.15	0.026	0.17	0.032	0.089
Unclassified Helicobacteraceae	0	0	0	40	1.2e-12	1.1e-11	0.00086	0.92	0.42	6e-07	1.2e-12	0.00065	1.2e-12	2e-06	0.037	0.0032	0.0057	0.018	0.03
Methylobacterium	0	0	0	40	1	1	1.2e-12	0.97	1	1.2e-12	0.99	1.2e-12	1	1.1e-12	0.017	0.0056	0.021	0.25	0.013
Unclassified Veillonellaceae	0	0	0	39	0.99	0.97	1.2e-12	0.89	1	1.2e-12	1	1.2e-12	1	1.1e-12	0.0083	0.0045	0.015	0.12	0.0072
Flexispira	0	0	0	39	1.2e-12	4.3e-12	0.95	1	0.71	1.2e-12	1.2e-12	1.3e-11	1.2e-12	0.93	0.04	0.00012	0	0.0031	0.034
Cellvibrio	0	0	0	38	1.2e-12	1.2e-12	5.1e-12	1.1e-12	1	0.27	0.56	0.28	0.35	0.00027	0.0093	0.0035	0.044	0.017	0.01
Unclassified 125ds10	0	0	1e-22	37	2.4e-06	1.5e-05	1.2e-12	1.1e-12	0.95	0.0019	0.00067	1.3e-05	2.6e-06	1	0.02	0.0026	0.045	0.0035	0.024
Aquicella	0	0	1e-22	37	3.2e-06	1.2e-12	1.2e-12	1.1e-12	0.12	0.00096	0.00039	0.57	0.45	1	0.023	0.0061	0.045	0.0067	0.012
Unclassified Acidobacteria5	0	0	1e-22	37	0.28	0.11	3.8e-10	1.2e-12	0.00033	1.2e-12	1.2e-12	0.00035	3.2e-07	0.54	0.034	0.0038	0.027	0.0077	0.02
Unclassified Hyphomonadaceae	0	0	1e-22	37	0.14	0.066	1.2e-12	1.2e-12	1	8.1e-06	5.1e-10	1.8e-06	2.6e-11	0.26	0.043	0.0049	0.057	0.014	0.042
Unclassified Sphingomonadales	0	0	4e-22	36	7.9e-10	4.3e-12	2e-12	1.1e-12	1	1	0.0053	0.99	0.0067	0.00035	0.022	0.006	0.057	0.023	0.021
Sediminibacterium	0	0	2.3e-21	34	0.96	0.48	2.7e-10	2.8e-09	0.92	1.6e-10	1.5e-09	1.2e-12	1.2e-12	0.97	0.019	0.0031	0.018	0.0019	0.021
Bacillus	0	0	2.4e-21	34	1.2e-12	1.1e-06	3.3e-10	1	0.0054	0.045	1.2e-12	0.86	1.5e-07	7.9e-12	0.48	0.088	0.082	0.36	0.32
Aquincola	0	1e-22	7e-21	34	0.00029	1.2e-12	1	1	0.0012	5.6e-05	3.6e-05	1.2e-12	1.2e-12	1	4.49	0.026	0.17	0.034	8.48
Unclassified Solibacterales	2e-22	8e-22	5e-20	32	1.2e-12	7.1e-05	1	1	0.00021	1.2e-12	1.2e-12	7.3e-06	1.5e-06	1	0.2	0.015	0.022	0.018	0.11
Unclassified Burkholderiaceae	7e-22	2.5e-21	1.6e-19	31	1.2e-12	7.2e-06	1	1	0.0043	1.2e-12	1.2e-12	4.5e-07	1.9e-07	1	0.2	0.019	0.023	0.02	0.12
Unclassified Koribacteraceae	1.5e-21	5.5e-21	3.6e-19	31	1.2e-12	0.0017	0.99	0.87	4.8e-05	1.2e-12	1.2e-12	6.9e-05	5.9e-06	0.99	0.36	0.051	0.078	0.063	0.2
Candidatus_Solibacter	1.5e-21	5.5e-21	3.6e-19	31	1.2e-12	0.00017	1	0.99	0.00017	1.2e-12	1.2e-12	4.1e-05	3.1e-06	0.99	0.15	0.014	0.02	0.02	0.083
Unclassified SBla14	6.3e-21	2.3e-20	1.5e-18	30	8.2e-07	4.7e-11	0.095	1.2e-12	0.76	0.0041	0.074	3e-06	0.61	1.1e-11	0.022	0.0063	0.059	0.045	0.014
Comamonas	6.8e-21	2.4e-20	1.6e-18	30	1.2e-12	1.2e-12	1.3e-12	1.2e-12	0.99	0.67	1	0.87	0.99	0.47	0.013	0.013	0.25	0.05	0.026
Unclassified Sinobacteraceae	1.3e-20	4.6e-20	3e-18	29	2.8e-08	0.1	0.086	0.014	0.0016	1.2e-12	1.2e-12	4.7e-06	1.3e-07	0.97	0.58	0.08	0.23	0.11	0.36
Marinobacter	1.4e-20	4.9e-20	3.3e-18	29	1	1	1.2e-12	1	1	2.1e-11	1	1.5e-12	1	1.2e-12	0.011	0.012	0.0029	0.25	0.012
Variovorax	2e-20	7e-20	4.6e-18	29	0.032	0.043	0.001	3.6e-06	1	1.4e-09	1.9e-12	3.5e-10	1.2e-12	0.7	0.03	0.0049	0.02	0.0083	0.029
Unclassified Cytophagaceae	4.2e-20	1.4e-19	9.7e-18	28	0.016	0.67	1.5e-05	2.8e-09	0.00019	2.3e-12	1.2e-12	0.0061	9.6e-06	0.48	0.081	0.015	0.057	0.025	0.048
Unclassified auto67_4W	5.5e-20	1.9e-19	1.3e-17	28	2.5e-11	0.017	0.62	0.55	0.00016	1.2e-12	1.2e-12	3.2e-05	1.4e-05	1	0.14	0.0042	0.024	0.0051	0.07
Mogibacterium	6.2e-20	2.1e-19	1.4e-17	28	0.36	0.26	1.3e-09	0.97	1	1.5e-12	0.65	1.2e-12	0.53	1.3e-12	0.034	0.046	0.051	0.1	0.034
Nitrospira	1.3e-19	4.3e-19	3e-17	28	0.75	2.9e-05	8.4e-11	1.2e-12	0.013	3.7e-06	1.8e-10	0.3	0.0014	0.26	0.071	0.011	0.082	0.026	0.041
Unclassified Phyllobacteriaceae	1.4e-19	4.6e-19	3.2e-17	28	0.041	8.5e-06	5.7e-12	1.2e-12	0.36	0.0011	1.9e-07	0.21	0.00045	0.2	0.025	0.005	0.036	0.011	0.018
Enterobacter	4.5e-19	1.5e-18	1e-16	27	0.19	1	5.6e-12	0.91	0.23	7.1e-05	0.015	1.7e-11	0.86	1.2e-12	0.027	0.0081	0.013	0.055	0.014
Sutterella	4.7e-19	1.5e-18	1.1e-16	27	3.4e-07	2.1e-09	0.94	0.77	0.99	2.3e-06	5.8e-11	1.3e-08	1.2e-12	0.21	0.047	0.012	0.017	0.021	0.05
Unclassified Methylophilaceae	4.8e-19	1.5e-18	1.1e-16	27	0.46	0.76	2.9e-06	5.5e-08	0.98	2.9e-09	4.2e-11	4.4e-09	4.1e-11	0.96	0.06	0.012	0.048	0.016	0.056
Candidatus_Koribacter	5.6e-19	1.8e-18	1.2e-16	27	1e-11	0.00012	1	0.94	0.009	1.5e-12	1.2e-12	2.3e-05	4.3e-07	0.94	0.12	0.013	0.021	0.021	0.075
Unclassified Rhodospirillaceae	6e-19	1.9e-18	1.3e-16	27	2.9e-08	0.11	0.57	0.014	0.0015	2e-12	1.2e-12	0.00057	1.6e-07	0.37	0.53	0.069	0.21	0.14	0.33
Unclassified Coxiellaceae	7.1e-19	2.2e-18	1.6e-16	26	1.5e-08	0.44	0.11	0.049	5.3e-05	1.2e-12	1.2e-12	0.00029	6.8e-05	1	0.046	0.0049	0.016	0.0059	0.024
Cronobacter	9e-19	2.8e-18	2e-16	26	0.78	0.2	2.3e-07	0.071	0.91	5e-09	0.79	1.4e-12	1	1.2e-12	0.0093	0.0045	0.014	0.037	0.0054
Unclassified Acetobacteraceae	1.3e-18	4e-18	2.8e-16	26	1.2e-08	0.0017	0.92	0.14	0.05	1.5e-11	1.2e-12	1.8e-05	4.8e-09	0.5	0.11	0.016	0.038	0.03	0.078
Streptomyces	1.8e-18	5.5e-18	3.9e-16	26	7.7e-12	0.00041	1	0.91	0.0031	2.8e-12	1.2e-12	0.00034	1.4e-06	0.75	0.084	0.018	0.024	0.026	0.055
Unclassified Ellin329	2.6e-18	7.8e-18	5.6e-16	26	1.9e-11	5.9e-06	1	1	0.073	2.1e-12	1.6e-12	9.1e-07	5.9e-07	1	0.28	0.021	0.021	0.02	0.19
Unclassified iii115	3.1e-18	9.2e-18	6.7e-16	25	0.013	0.9	0.00019	5.2e-08	0.00071	2.1e-11	1.2e-12	0.0086	1.1e-05	0.43	0.34	0.056	0.23	0.1	0.2
Exiguobacterium	3.4e-18	1e-17	7.3e-16	25	0.015	0.007	0.0016	0.0026	1	5.3e-10	8.2e-10	1.5e-11	2.1e-11	1	0.22	0.033	0.12	0.028	0.22
Unclassified Pedosphaerales	4.6e-18	1.3e-17	9.8e-16	25	1.4e-07	0.14	0.18	0.04	0.003	1.2e-12	1.2e-12	4.3e-05	1.8e-06	0.97	0.072	0.0092	0.027	0.013	0.044
Coprococcus	4.9e-18	1.4e-17	1e-15	25	0.04	5e-05	1.4e-12	1	0.58	0.00022	0.038	0.026	1.9e-05	1.2e-12	0.035	0.0083	0.0064	0.075	0.049
Unclassified Gemm1	6.8e-18	1.9e-17	1.4e-15	25	3.9e-11	0.02	1	0.55	0.00017	2.2e-12	1.2e-12	0.0065	1.9e-05	0.57	0.17	0.027	0.049	0.047	0.098
Unclassified 03196A21	2.8e-17	8e-17	5.9e-15	24	0.015	8.5e-08	8.1e-05	1.2e-12	0.14	0.94	5e-06	0.35	0.036	3.5e-06	0.042	0.0098	0.064	0.037	0.026
Unclassified Chitinophagaceae	4.5e-17	1.3e-16	9.4e-15	24	8.2e-06	0.00036	0.08	0.66	0.78	3.7e-12	1.4e-09	1.6e-10	9.5e-08	0.64	0.12	0.038	0.054	0.023	0.11
SMB53	5.1e-17	1.4e-16	1.1e-14	24	0.75	0.75	1.6e-12	0.99	1	8.4e-08	0.91	2.4e-09	0.92	1.2e-12	0.036	0.019	0.0098	0.16	0.034
Mycobacterium	8.7e-17	2.4e-16	1.8e-14	23	1.8e-08	6e-12	1.4e-11	1.2e-12	0.93	1	0.68	0.94	0.99	0.64	0.026	0.012	0.095	0.024	0.017
Unclassified Acidimicrobiales	1.1e-16	3e-16	2.3e-14	23	0.12	0.97	1.9e-05	1.1e-07	0.028	2.5e-10	1.7e-12	0.00048	5.9e-06	0.87	0.13	0.032	0.1	0.043	0.092
Halomonas	1.6e-16	4.4e-16	3.3e-14	23	1.1e-10	6e-12	5.8e-09	0.043	1	0.46	6.3e-06	0.41	8.4e-07	0.00057	17.44	8.26	3.68	14.39	17.33
Unclassified Ellin6075	2.1e-16	5.7e-16	4.3e-14	23	0.00031	6e-09	1.8e-12	1.2e-12	0.44	0.057	0.0082	0.87	0.47	0.95	0.034	0.014	0.061	0.017	0.023
Unclassified RB40	3.5e-16	9.4e-16	7.1e-14	22	5e-07	0.62	0.098	0.07	0.00028	1.2e-12	1.2e-12	0.00087	0.00044	1	0.045	0.005	0.016	0.0053	0.023
Devosia	4.5e-16	1.2e-15	9.1e-14	22	0.00011	0.53	0.24	0.0004	0.025	1.9e-09	1.2e-12	0.0023	1.5e-07	0.17	0.11	0.018	0.06	0.039	0.077
Unclassified Rhizobiales	6.4e-16	1.7e-15	1.3e-13	22	1	1.5e-06	0.17	0.044	3.7e-05	0.15	0.044	1.5e-12	1.2e-12	0.98	0.34	0.03	0.31	0.08	0.9
Bulleidia	1.4e-14	3.6e-14	2.8e-12	20	0.96	0.25	1.1e-07	1	0.75	4e-08	0.82	1.4e-12	0.072	2.9e-08	0.16	0.2	0.18	0.37	0.12
Actinomyces	1.4e-14	3.6e-14	2.8e-12	20	0.71	0.48	6.7e-08	0.51	1	7.1e-10	0.043	3.8e-12	0.0079	1.5e-05	0.19	0.45	0.32	0.82	0.17
Unclassified Sva0725	1.6e-14	4.1e-14	3.2e-12	20	3.3e-06	0.0022	0.92	0.3	0.4	1.1e-08	1.7e-11	2.4e-05	6.4e-08	0.77	0.036	0.0082	0.015	0.012	0.029
Weissella	1.7e-14	4.3e-14	3.4e-12	20	0.84	0.8	2.3e-08	1	1	1.1e-09	0.64	2.8e-11	0.54	3.1e-09	0.0073	0.036	0.03	0.15	0.007
Janibacter	1.8e-14	4.6e-14	3.5e-12	20	1.8e-05	4.4e-06	5.2e-06	0.98	1	0.99	2.2e-07	0.99	1.9e-08	1.1e-08	0.014	0.086	0.08	0.02	0.015
Arthrobacter	2.3e-14	5.8e-14	4.5e-12	20	9.5e-05	1.9e-08	0.87	0.43	0.73	3.8e-07	0.0092	5.3e-12	6.2e-06	0.03	0.025	0.013	0.007	0.0036	0.03
Unclassified RF39	2.4e-14	5.9e-14	4.7e-12	20	0.00026	0.00096	1.2e-08	0.99	0.97	0.76	1.1e-05	0.27	3.7e-05	1.3e-11	0.053	0.012	0.016	0.063	0.048
Unclassified Gemellaceae	2.4e-14	5.9e-14	4.7e-12	20	1	1	4.8e-10	0.98	0.99	4.2e-09	0.93	2.8e-09	1	2.4e-10	0.69	0.83	0.74	1.81	0.77
Marivita	3.1e-14	7.6e-14	6e-12	19	0.0061	1.1e-09	1	1	0.05	0.0028	0.0022	6.2e-11	2.3e-11	1	0.04	0.00071	0.00089	0.00067	0.071
Ramlibacter	3.4e-14	8.3e-14	6.5e-12	19	0.00025	3.5e-07	1	0.91	0.87	2.3e-05	1.3e-06	7.3e-09	1.2e-10	0.98	0.11	0.02	0.033	0.028	0.12
Unclassified Ellin6513	3.7e-14	8.9e-14	7.1e-12	19	8.2e-09	0.091	0.82	0.93	0.00082	3.2e-12	5.9e-12	0.0019	0.0043	1	0.4	0.051	0.084	0.038	0.2
Unclassified Sphingobacteriaceae	4.6e-14	1.1e-13	8.7e-12	19	4.6e-06	0.035	0.67	0.052	0.1	0.00028	1.4e-12	0.4	1.3e-07	0.00012	0.032	0.0033	0.012	0.017	0.022
Unclassified Xanthomonadaceae	5.8e-14	1.4e-13	1.1e-11	19	0.05	0.99	0.037	8.9e-07	0.015	8e-07	1.6e-12	0.14	1.5e-05	0.046	0.67	0.12	0.46	0.28	0.43
Unclassified Ellin6529	8.4e-14	2e-13	1.6e-11	19	0.0026	1.8e-06	6.6e-07	1.2e-12	0.71	0.78	0.0018	1	0.072	0.017	0.045	0.014	0.077	0.035	0.034
Unclassified Shewanellaceae	1.5e-13	3.5e-13	2.8e-11	18	0.00028	2.2e-05	1.2e-12	0.0024	1	0.017	0.73	0.016	0.49	2.3e-06	0.091	0.076	0.033	0.13	0.095
Pseudoxanthomonas	1.7e-13	4e-13	3.2e-11	18	4.1e-05	3.2e-06	0.18	4.2e-12	1	0.028	0.35	0.0068	0.36	1.4e-07	0.02	0.003	0.065	0.046	0.018
Unclassified Hyphomicrobiaceae	2.7e-13	6.2e-13	5e-11	18	0.02	9.9e-05	3.6e-08	1.3e-12	0.81	0.15	0.00055	0.74	0.015	0.23	0.031	0.0092	0.048	0.018	0.024
Unclassified Streptophyta	2.8e-13	6.4e-13	5.2e-11	18	2.4e-07	8.4e-08	1.9e-09	0.21	1	1	0.00027	1	0.00016	8.5e-06	1.11	7.59	10.52	1.21	1.48
Thiobacillus	2.8e-13	6.4e-13	5.2e-11	18	5.5e-10	3e-11	3.6e-09	2.5e-07	1	0.69	0.2	0.65	0.15	0.86	0.0044	0.015	0.041	0.011	0.0046
Rhodoplanes	7.9e-13	1.8e-12	1.4e-10	17	4.9e-09	0.016	1	0.99	0.0049	1.8e-09	2e-11	0.016	0.0013	0.95	0.46	0.081	0.1	0.11	0.26
Unclassified Gemmatimonadetes	8.2e-13	1.8e-12	1.5e-10	17	3.5e-05	0.015	1	0.11	0.39	4.3e-06	2.7e-11	0.0039	1.2e-07	0.11	0.046	0.0076	0.019	0.018	0.036
Opitutus	1.1e-12	2.5e-12	2e-10	17	0.28	0.93	0.00058	2.2e-06	0.055	1.8e-07	2.6e-10	0.015	0.00018	0.73	0.029	0.0019	0.02	0.0059	0.017
Unclassified Methylobacteriaceae	1.7e-12	3.7e-12	3e-10	17	4e-05	3.6e-08	0.061	1	0.88	0.085	5e-06	0.0013	8.8e-10	0.021	0.56	0.0088	0.016	0.28	0.67
Unclassified CCU21	1.7e-12	3.7e-12	3e-10	17	0.27	3.9e-05	2.9e-06	2.9e-12	0.13	0.064	2.1e-05	1	0.094	0.082	0.022	0.0063	0.029	0.013	0.014
Unclassified EB1017	2.4e-12	5.3e-12	4.2e-10	17	0.0071	1	0.93	7.3e-05	0.014	0.00021	2.3e-12	0.86	3.6e-05	0.0006	0.028	0.0031	0.016	0.014	0.017
Lysobacter	2.8e-12	6.1e-12	4.9e-10	17	0.96	0.39	6.1e-05	2.1e-10	0.87	0.0055	5.7e-07	0.064	1.3e-05	0.11	0.029	0.0075	0.032	0.015	0.025
Unclassified Streptomycetaceae	3.2e-12	6.9e-12	5.6e-10	16	5.6e-06	0.0018	0.96	0.85	0.5	4.9e-08	5e-09	3.9e-05	5.3e-06	1	0.027	0.0057	0.0088	0.0067	0.021
Phenylobacterium	4e-12	8.6e-12	7e-10	16	1	0.0082	2.3e-07	2.3e-08	0.019	3.2e-06	5.1e-07	0.22	0.11	1	0.29	0.0086	0.29	0.022	0.12
Saccharopolyspora	5e-12	1.1e-11	8.6e-10	16	1	1	4.9e-08	1	1	1e-06	1	5.1e-08	1	8.8e-10	0.0022	0.0014	0.0018	0.094	0.00093
Unclassified Lactobacillales	6e-12	1.3e-11	1e-09	16	0.25	0.18	0.00043	0.4	1	8.7e-08	0.98	4.2e-09	0.96	3e-09	0.0037	0.0088	0.022	0.055	0.0035
Unclassified Betaproteobacteria	6.8e-12	1.4e-11	1.2e-09	16	0.13	0.97	0.17	1.8e-05	0.41	8.4e-05	2.2e-10	0.032	6.9e-07	0.043	0.13	0.034	0.093	0.065	0.1
Thermomonas	1e-11	2.1e-11	1.7e-09	16	2.5e-06	3.4e-07	5.5e-11	1.5e-09	1	0.88	1	0.83	1	0.94	0.024	0.022	0.06	0.018	0.024
Desulfovibrio	1.9e-11	3.9e-11	3.2e-09	15	1	1	3e-06	0.57	1	7.6e-05	0.52	8.3e-06	0.48	1.2e-11	0.024	0.0051	0.021	0.079	0.023
Unclassified Clostridiales	2.3e-11	4.7e-11	3.9e-09	15	0.013	0.00018	1.1e-08	0.96	0.92	0.14	0.038	0.52	0.00052	1.3e-08	0.55	0.21	0.13	0.83	0.65
Anaerococcus	4.4e-11	9e-11	7.3e-09	15	0.002	7.6e-07	2.6e-11	1.3e-07	0.66	0.061	0.72	0.67	1	0.39	0.016	0.01	0.033	0.0039	0.0093
Neisseria	5.6e-11	1.1e-10	9.3e-09	15	3.8e-07	1.8e-08	0.42	0.0005	1	0.00014	0.13	1.4e-05	0.053	0.086	0.062	0.13	0.24	0.19	0.059
Unclassified Alteromonadaceae	7.2e-11	1.5e-10	1.2e-08	15	1	1	2.8e-08	0.63	1	3.6e-07	0.66	2.2e-07	0.83	2.3e-06	0.0068	0.02	0.0077	0.063	0.011
Unclassified Rhodobacteraceae	1.1e-10	2.2e-10	1.8e-08	14	0.98	0.00023	0.25	0.23	0.0067	0.11	0.096	1.7e-09	7.2e-10	1	0.35	0.1	0.29	0.1	0.71
Unclassified Gammaproteobacteria	1.4e-10	2.8e-10	2.3e-08	14	0.022	1.2e-05	6e-09	1.1e-09	0.53	0.072	0.046	0.84	0.76	1	0.053	0.017	0.096	0.019	0.031
Unclassified Solirubrobacterales	2.7e-10	5.4e-10	4.4e-08	14	0.56	0.042	0.00038	2.3e-10	0.81	0.18	4.5e-05	0.79	0.0016	0.032	0.075	0.024	0.093	0.05	0.062
Megasphaera	2.9e-10	5.7e-10	4.7e-08	14	0.13	0.14	0.0018	0.97	1	7.9e-08	0.29	1.6e-08	0.32	1.5e-05	0.0054	0.015	0.018	0.035	0.0065
Dokdonella	3.7e-10	7.3e-10	5.9e-08	14	8.4e-06	4.2e-05	1	0.99	0.96	1e-05	8.9e-06	5.1e-05	4.3e-05	1	0.034	0.0095	0.0075	0.0092	0.031
Arcobacter	3.8e-10	7.4e-10	6e-08	14	0.015	0.00041	0.72	0.77	0.96	0.00011	0.00011	3.2e-07	2.8e-07	1	0.14	0.015	0.045	0.013	0.16
Unclassified Mogibacteriaceae	4.1e-10	8e-10	6.5e-08	13	0.55	0.0035	0.058	0.089	0.38	0.00061	0.97	3.3e-09	0.6	2.5e-07	0.14	0.12	0.17	0.23	0.095
Oscillospira	6.4e-10	1.2e-09	1e-07	13	0.039	9.7e-06	0.00039	1	0.38	0.93	0.0081	0.74	1.8e-07	1e-05	0.12	0.011	0.021	0.14	0.18
Unclassified Halomonadaceae	9.5e-10	1.8e-09	1.5e-07	13	1	1	2e-07	0.0043	1	1.8e-05	0.041	1.4e-06	0.014	0.079	0.058	0.1	0.052	0.13	0.057
Haemophilus	9.8e-10	1.9e-09	1.5e-07	13	0.32	0.95	0.041	0.0052	0.75	6.9e-05	0.81	0.0036	0.069	3e-10	1.59	1.14	2.43	3.5	2.12
Unclassified Coriobacteriaceae	1e-09	1.9e-09	1.5e-07	13	1	0.93	6.5e-08	0.64	0.97	1.9e-06	0.78	7.9e-06	0.99	5e-06	0.0068	0.011	0.0064	0.027	0.0094
Rothia	1e-09	1.9e-09	1.5e-07	13	0.83	0.72	3e-05	0.3	1	1.2e-06	0.035	4.6e-08	0.01	0.014	0.3	1.04	0.59	1.72	0.27
Streptococcus	1.7e-09	3.2e-09	2.6e-07	13	1	0.98	2.8e-07	0.0019	1	1.6e-05	0.018	8.7e-06	0.019	0.16	4.53	8.18	4.19	10.39	4.87
Unclassified Microbacteriaceae	2e-09	3.7e-09	3e-07	12	1.6e-05	4.9e-07	0.01	2.4e-08	1	0.18	1	0.051	1	0.022	0.011	0.01	0.031	0.02	0.01
Myxococcus	2e-09	3.7e-09	3e-07	12	8.2e-06	1.1e-06	7.3e-08	4.1e-08	1	1	1	1	1	1	0.0029	0.0017	0.13	0.0008	0.0026
Lautropia	2.5e-09	4.6e-09	3.7e-07	12	6.1e-08	2.3e-06	6e-06	2.2e-07	0.82	0.44	0.72	0.97	1	0.98	0.031	0.051	0.14	0.059	0.05
Unclassified Myxococcales	2.6e-09	4.8e-09	3.8e-07	12	0.065	0.00099	0.89	0.45	0.86	0.003	0.00016	5.5e-06	6.9e-08	0.93	0.26	0.028	0.11	0.063	0.31
Unclassified Methylocystaceae	9.2e-09	1.7e-08	1.4e-06	12	2.1e-07	0.16	0.99	1	0.0031	3e-07	8.8e-08	0.27	0.2	1	0.068	0.015	0.013	0.017	0.033
Unclassified Peptostreptococcaceae	9.9e-09	1.8e-08	1.4e-06	12	6.9e-05	5.1e-07	0.093	1.4e-06	0.97	0.08	1	0.005	0.94	0.02	0.029	0.029	0.11	0.072	0.018
Unclassified Ellin515	1.7e-08	3.1e-08	2.5e-06	11	0.0022	0.12	0.85	0.36	0.56	1.9e-05	3.4e-07	0.0042	0.00015	0.91	0.046	0.0082	0.019	0.013	0.035
Unclassified ABS6	1.8e-08	3.2e-08	2.6e-06	11	0.88	0.0054	0.11	3.6e-08	0.17	0.76	0.0001	0.68	0.17	0.0011	0.015	0.0017	0.018	0.011	0.0078
Ruminococcus	2.8e-08	5e-08	4e-06	11	0.69	0.43	4.1e-07	0.98	1	0.002	0.9	0.002	0.68	3.7e-07	0.08	0.044	0.024	0.23	0.092
Unclassified Ellin5290	3.2e-08	5.7e-08	4.5e-06	11	3.9e-07	0.0012	0.095	0.88	0.25	0.0023	3.2e-06	0.45	0.0096	0.41	0.035	0.0068	0.0021	0.015	0.023
Peptococcus	4.1e-08	7.2e-08	5.8e-06	11	0.67	1	5.3e-05	0.95	0.59	0.044	0.22	3.4e-05	0.98	8.2e-08	0.037	0.021	0.026	0.059	0.025
Brevundimonas	4.6e-08	8.1e-08	6.4e-06	11	0.98	0.95	0.00045	0.79	1	0.00017	1	1.8e-05	1	1.6e-07	0.031	0.0094	0.066	0.28	0.025
Butyrivibrio	5.1e-08	8.9e-08	7.1e-06	11	0.96	0.97	0.00011	0.95	0.72	0.008	0.64	5.6e-06	1	2.2e-07	0.013	0.0087	0.011	0.023	0.0087
Leptotrichia	5.6e-08	9.7e-08	7.7e-06	11	1	1	0.075	2.3e-06	1	0.28	0.00014	0.16	1.3e-05	0.035	0.13	0.58	0.09	0.34	0.12
Unclassified Bacillaceae	7.1e-08	1.2e-07	9.7e-06	10	6e-06	0.00034	0.88	0.69	0.76	7.7e-05	0.00021	0.0039	0.0095	1	0.038	0.011	0.0039	0.0093	0.03
Parvimonas	1.1e-07	1.9e-07	1.5e-05	10	1	0.99	2.3e-05	0.16	0.99	0.0002	0.26	2.1e-06	0.042	0.034	0.11	0.18	0.11	0.25	0.096
Unclassified Ruminococcaceae	1.3e-07	2.2e-07	1.8e-05	10	0.94	0.4	0.0001	0.89	0.91	0.011	0.47	0.081	0.041	6.7e-08	0.22	0.066	0.14	0.52	0.3
Unclassified ASSO13	1.4e-07	2.4e-07	1.9e-05	9.9	0.99	0.15	0.24	0.012	0.48	0.12	0.0058	9.6e-05	2.8e-07	0.75	0.037	0.0015	0.032	0.012	0.056
Nelumbo	1.6e-07	2.7e-07	2.1e-05	9.9	0.043	0.035	0.023	0.6	1	1	0.00019	1	7e-05	1.4e-05	0.0071	0.12	0.086	0.013	0.011
Unclassified Saprospiraceae	1.8e-07	3e-07	2.4e-05	9.8	0.6	0.1	0.14	0.14	0.92	0.003	0.0027	1.4e-05	1e-05	1	0.073	0.018	0.049	0.017	0.086
Unclassified Methylococcales	4.1e-07	6.8e-07	5.4e-05	9.3	1.2e-05	0.33	1	1	0.014	4.4e-06	1.4e-06	0.31	0.22	1	0.54	0	0.0043	0.013	0.19
Unclassified Gaiellaceae	6.2e-07	1e-06	8.1e-05	9.1	3e-05	0.46	1	1	0.013	7.2e-06	1e-06	0.38	0.2	1	0.49	0.03	0.057	0.055	0.2
Unclassified WPS2	7e-07	1.2e-06	9e-05	9	0.92	1	0.19	0.00021	0.92	0.034	2.3e-05	0.19	0.00025	0.17	0.031	0.006	0.026	0.016	0.026
Vagococcus	7.2e-07	1.2e-06	9.2e-05	9	0.73	0.039	0.21	0.43	0.63	0.011	0.034	4.6e-06	2.4e-05	0.99	0.021	0.006	0.014	0.0037	0.029
Unclassified Actinomycetales	8.1e-07	1.3e-06	0.0001	8.9	0.032	0.96	0.087	0.29	0.16	0.94	1.5e-05	0.39	0.06	1.3e-05	0.088	0.035	0.054	0.079	0.061
Dok59	1.1e-06	1.8e-06	0.00014	8.7	0.42	1	0.0018	3e-05	0.62	0.49	0.11	0.0068	0.00018	0.87	0.016	0.0046	0.025	0.0084	0.023
Rhodococcus	1.2e-06	1.9e-06	0.00015	8.7	0.98	0.98	0.06	0.073	0.83	0.35	0.028	0.012	0.28	1.7e-07	0.16	0.0073	0.13	0.26	0.1
Roseburia	1.7e-06	2.7e-06	0.00021	8.5	1	1	0.00017	1	1	0.00081	1	0.00023	1	1.7e-05	0.002	0.0018	0.0021	0.049	0.0024
Unclassified Haliangiaceae	1.9e-06	3e-06	0.00023	8.4	0.0022	0.25	0.99	0.58	0.37	0.005	1.7e-06	0.44	0.0025	0.2	0.084	0.011	0.029	0.035	0.057
Chryseobacterium	2.1e-06	3.4e-06	0.00026	8.3	0.15	0.0006	0.00032	1.1e-06	0.59	0.63	0.11	1	0.88	0.74	0.019	0.01	0.027	0.014	0.013
Unclassified N1423WL	2.7e-06	4.3e-06	0.00033	8.2	0.0071	0.00044	0.95	1	0.99	0.03	0.004	0.0023	0.00014	0.96	0.02	0.0064	0.0061	0.0085	0.021
Prevotella	2.7e-06	4.3e-06	0.00033	8.2	0.82	1	0.0084	0.00011	0.83	0.32	0.035	0.01	0.00015	0.79	5.31	8.63	3.97	7.54	3.99
Unclassified Pasteurellaceae	3.5e-06	5.5e-06	0.00042	8.1	0.00083	0.11	0.9	0.31	0.44	8.8e-06	0.082	0.0049	0.94	0.019	0.029	0.057	0.076	0.085	0.049
Modestobacter	4.2e-06	6.6e-06	0.0005	7.9	0.029	0.0015	0.71	0.97	0.98	0.29	0.002	0.041	2.4e-05	0.22	0.017	0.0045	0.0064	0.01	0.019
Alcanivorax	5.1e-06	7.9e-06	0.0006	7.8	0.97	0.99	0.0001	1	1	0.0069	0.99	0.00077	1	3.1e-05	0.017	0.006	0.0016	0.096	0.011
Unclassified Neisseriaceae	5.6e-06	8.7e-06	0.00065	7.8	0.85	0.99	0.04	0.24	0.6	0.56	0.028	0.0093	0.55	1.5e-06	4.53	2.42	3.75	5.62	3.41
Allobaculum	6.2e-06	9.6e-06	0.00071	7.7	0.13	0.0054	0.0019	1	0.91	0.88	0.078	1	0.0014	0.0003	0.022	0	0.00036	0.03	0.03
Granulicatella	7.6e-06	1.2e-05	0.00087	7.6	0.12	0.12	0.21	0.98	1	0.00011	0.22	4.9e-05	0.23	0.03	0.5	0.69	0.73	0.9	0.52
Geobacter	8e-06	1.2e-05	0.0009	7.6	0.04	0.038	0.0083	8.3e-07	1	1	0.31	1	0.14	0.16	0.017	0.0062	0.035	0.017	0.019
Unclassified Desulfuromonadaceae	9.3e-06	1.4e-05	0.001	7.5	0.001	0.014	1	0.82	0.87	0.00016	0.011	0.0028	0.11	0.59	0.05	0.015	0.0043	0.0017	0.039
Synechococcus	1.1e-05	1.7e-05	0.0012	7.4	1	1	0.00041	0.9	1	0.00075	0.83	0.00017	0.78	0.0029	0.00049	0.011	0.0029	0.043	0.00037
Unclassified MND1	1.2e-05	1.8e-05	0.0013	7.3	0.62	0.94	0.12	0.0039	0.22	0.0028	3.2e-05	0.54	0.059	0.74	0.11	0.03	0.088	0.048	0.074
Kingella	1.3e-05	2e-05	0.0014	7.3	0.0035	0.87	0.99	0.51	0.059	0.0064	2.1e-06	0.97	0.071	0.19	0.3	0.1	0.15	0.17	0.19
Lupinus	2.9e-05	4.3e-05	0.0031	6.8	5.7e-05	0.16	0.94	0.94	0.093	0.00038	0.00024	0.48	0.43	1	0.13	0.018	0.00018	0.019	0.059
Unclassified S247	3.1e-05	4.6e-05	0.0033	6.8	0.42	0.3	0.00018	1	1	0.21	0.5	0.17	0.36	8.4e-05	0.37	0.097	0.053	0.75	0.39
Unclassified Enterobacteriaceae	3.9e-05	5.8e-05	0.0041	6.6	1	1	0.0035	1	1	0.0035	1	0.0011	1	0.00016	0.13	0.14	0.25	1.38	0.13
Paludibacter	4.6e-05	6.8e-05	0.0048	6.5	0.99	0.21	0.35	6e-05	0.55	0.75	0.0025	0.99	0.18	0.028	0.022	0.0069	0.024	0.017	0.015
Unclassified Planococcaceae	4.8e-05	7e-05	0.005	6.5	0.0013	9.7e-05	0.058	0.27	1	0.47	0.13	0.21	0.029	0.93	0.084	0.12	0.15	0.11	0.078
Unclassified Lachnospiraceae	5.2e-05	7.6e-05	0.0054	6.5	0.89	0.85	9.1e-05	0.026	1	0.016	0.43	0.0075	0.36	0.39	0.29	0.51	0.16	0.71	0.29
Kaistobacter	5.4e-05	7.8e-05	0.0055	6.4	0.048	0.51	0.84	0.59	0.7	0.0013	0.00023	0.055	0.014	0.99	0.17	0.081	0.11	0.089	0.14
Unclassified SCI84	5.9e-05	8.5e-05	0.006	6.4	0.00024	0.074	0.97	0.031	0.34	0.00091	0.27	0.21	1	0.11	0.18	0.12	0.045	0.062	0.12
Lactococcus	6.5e-05	9.4e-05	0.0065	6.3	1	0.84	0.99	0.0028	0.91	0.98	0.013	0.5	0.096	8.2e-05	0.062	0.02	0.063	0.07	0.05
Hyphomonas	6.7e-05	9.6e-05	0.0066	6.3	0.081	0.016	1	0.0016	1	0.13	0.96	0.025	1	0.0022	0.0049	0.00048	0.022	0.02	0.0024
Unclassified Micrococcaceae	9.2e-05	0.00013	0.009	6.1	0.8	1	0.78	0.02	0.71	0.18	0.5	0.89	0.011	5.7e-05	0.08	0.11	0.054	0.032	0.05
Unclassified Ellin6067	9.7e-05	0.00014	0.0094	6.1	0.0039	0.15	0.67	0.98	0.61	0.081	0.00017	0.79	0.02	0.22	0.08	0.024	0.031	0.047	0.06
Lactobacillus	9.7e-05	0.00014	0.0094	6.1	0.99	0.99	0.82	0.00043	1	0.98	0.0092	0.98	0.0033	0.0091	0.9	5.73	0.26	1.7	0.9
Candidatus_Portiera	0.0001	0.00014	0.0095	6.1	0.97	0.93	0.012	0.44	1	0.0031	0.17	0.00061	0.081	0.41	0.0029	0.03	0.011	0.047	0.0017
Erwinia	0.00011	0.00015	0.01	6	1	0.99	0.012	0.95	1	0.02	0.98	0.0022	1	0.00015	0.33	0.13	0.38	1.51	0.2
Steroidobacter	0.00012	0.00017	0.011	6	0.98	0.44	0.9	0.085	0.86	1	0.032	0.88	0.00018	0.0021	0.016	0.0042	0.013	0.017	0.02
Unclassified Ignavibacteriaceae	0.00014	0.00019	0.013	5.9	0.64	0.0019	1	1	0.23	0.76	0.38	0.0022	0.00012	0.96	0.026	0.0011	0.0052	0.0092	0.058
Atopobium	0.00017	0.00024	0.015	5.8	0.58	0.048	0.5	0.96	0.81	0.024	0.87	8.1e-05	0.14	0.086	0.12	0.17	0.19	0.26	0.065
Enhydrobacter	0.00018	0.00025	0.016	5.8	0.13	0.57	5.7e-05	0.034	0.87	0.44	1	0.026	0.74	0.27	0.057	0.056	0.1	0.025	0.076
Unclassified Desulfobulbaceae	0.00024	0.00033	0.021	5.6	0.036	0.016	0.99	0.74	1	0.0071	0.28	0.002	0.17	0.4	0.055	0.026	0.01	0.0051	0.056
Stenotrophomonas	0.00025	0.00034	0.022	5.5	0.46	0.93	0.82	0.026	0.12	0.052	0.0001	1	0.24	0.25	0.068	0.026	0.051	0.042	0.044
Unclassified C111	0.00031	0.00042	0.027	5.4	0.99	1	0.029	0.83	0.98	0.018	0.99	0.049	0.75	0.00014	0.012	0.0077	0.016	0.041	0.018
Unclassified Erysipelotrichaceae	0.00035	0.00047	0.03	5.4	1	1	0.0057	1	1	0.013	1	0.0065	1	0.0012	0.0073	0.0077	0.0088	0.089	0.0089
Dialister	0.00037	0.0005	0.031	5.3	1	1	0.93	0.0037	1	0.92	0.008	0.94	0.0042	0.024	0.058	0.22	0.063	0.099	0.063
Unclassified Piscirickettsiaceae	0.00044	0.00059	0.037	5.2	0.048	0.037	0.98	0.9	1	0.0064	0.19	0.0035	0.17	0.52	0.17	0.077	0.045	0.025	0.16
Unclassified Moraxellaceae	0.00057	0.00076	0.047	5.1	0.02	0.0054	0.0015	0.0011	1	1	1	1	1	1	0.036	0.017	0.31	0.016	0.022
Planctomyces	0.00058	0.00077	0.048	5.1	0.16	0.98	0.43	0.4	0.046	0.00086	0.00065	0.81	0.8	1	0.04	0.013	0.024	0.013	0.02
Parabacteroides	0.00059	0.00078	0.048	5	0.38	0.51	0.0012	0.99	1	0.47	0.58	0.2	0.73	0.0018	0.013	0.0068	0.0048	0.02	0.012
Unclassified Marinicellaceae	0.00068	0.0009	0.054	5	0.51	0.64	0.24	0.85	1	0.0041	0.071	0.0045	0.092	0.75	0.033	0.013	0.02	0.0049	0.031
Unclassified TM73	0.00069	0.00091	0.055	5	0.99	1	1	0.015	1	0.95	0.0096	0.95	0.0043	0.019	0.034	0.17	0.052	0.064	0.036
Cardiobacterium	0.00078	0.001	0.061	4.9	0.17	0.45	0.78	0.24	0.96	0.0067	0.98	0.03	1	0.0045	0.01	0.012	0.019	0.022	0.013
Unclassified Solirubrobacteraceae	0.00086	0.0011	0.066	4.8	0.41	0.096	0.76	0.76	0.98	0.94	0.028	0.57	0.0011	0.074	0.014	0.0044	0.008	0.012	0.016
Vibrio	0.00087	0.0011	0.066	4.8	0.049	0.00083	0.012	0.32	0.89	1	0.72	0.83	0.1	0.54	0.049	0.034	0.012	0.05	0.062
Helicobacter	0.00099	0.0013	0.074	4.7	1	1	0.97	0.025	1	0.88	0.13	0.97	0.027	0.00086	17.06	28.98	15.25	12.23	15.22
Spirodela	0.001	0.0013	0.074	4.7	0.65	0.4	1	0.0063	1	0.56	0.48	0.29	0.59	0.0016	0.045	0.086	0.008	0.0064	0.052
Veillonella	0.0013	0.0017	0.095	4.6	1	0.98	0.92	0.018	1	0.91	0.031	0.64	0.0029	0.11	1.05	4	1.16	1.93	0.62
Propionibacterium	0.0013	0.0017	0.095	4.6	0.0016	0.96	1	0.91	0.016	0.0016	0.0085	0.99	1	0.97	0.066	0.037	0.031	0.033	0.036
Campylobacter	0.0015	0.0019	0.11	4.5	1	0.97	0.03	0.28	0.95	0.1	0.5	0.004	0.068	0.8	0.11	0.15	0.1	0.18	0.089
Unclassified DS18	0.0017	0.0022	0.12	4.4	0.4	1	0.88	0.27	0.62	0.85	0.0022	0.98	0.12	0.013	0.028	0.01	0.019	0.023	0.021
Aggregatibacter	0.0019	0.0024	0.13	4.4	0.077	0.0036	0.03	0.71	0.95	1	0.48	0.88	0.063	0.34	0.4	0.27	0.18	0.39	0.46
Unclassified Bartonellaceae	0.0027	0.0034	0.18	4.2	0.49	1	0.0072	0.98	0.66	0.65	0.73	0.02	1	0.016	0.013	0.019	0.022	0.0057	0.021
Peptoniphilus	0.0028	0.0035	0.19	4.1	0.056	0.017	0.0024	0.012	1	0.99	1	1	1	0.97	0.008	0.0081	0.044	0.0019	0.0056
Unclassified Alcaligenaceae	0.003	0.0038	0.2	4.1	0.2	0.16	0.89	0.88	1	0.017	0.58	0.0088	0.54	0.25	0.028	0.04	0.048	0.055	0.029
Unclassified SR1	0.0031	0.0039	0.2	4.1	1	1	0.93	0.023	1	0.88	0.028	0.83	0.011	0.12	0.012	0.11	0.02	0.044	0.012
Unclassified Clostridiaceae	0.0032	0.004	0.2	4.1	0.94	1	0.016	0.12	0.95	0.24	0.64	0.019	0.13	0.91	0.2	0.27	0.16	0.31	0.16
Pseudoalteromonas	0.0035	0.0043	0.22	4	0.21	0.031	0.0013	0.057	0.98	0.72	1	0.95	0.99	0.65	0.048	0.05	0.014	0.066	0.056
Hydrogenophilus	0.0038	0.0047	0.24	4	1	1	1	0.049	1	1	0.047	1	0.023	0.014	0.0076	0.46	0.053	0.026	0.0094
Macrococcus	0.0047	0.0058	0.29	3.8	0.26	0.35	0.78	1	1	0.014	0.2	0.018	0.27	0.69	0.022	0.009	0.0089	0.0025	0.02
Actinobacillus	0.0049	0.006	0.29	3.8	0.95	0.44	0.055	1	0.15	0.012	0.81	0.91	0.56	0.067	0.54	1.05	0.9	2.08	1.7
Bacteroides	0.0066	0.008	0.39	3.6	0.56	0.21	0.0018	0.2	0.99	0.35	1	0.59	1	0.34	0.12	0.14	0.062	0.19	0.14
Unclassified Oxalobacteraceae	0.0073	0.0089	0.42	3.6	1	0.99	0.35	0.52	1	0.52	0.54	0.62	0.28	0.0019	0.2	0.32	0.21	0.083	0.18
Sarcina	0.011	0.013	0.63	3.3	1	1	1	0.092	1	1	0.1	1	0.054	0.025	0.00049	0.041	0.0038	0	0.00019
Unclassified Stramenopiles	0.012	0.014	0.67	3.3	0.84	0.71	0.99	0.4	1	0.96	0.057	0.89	0.016	0.11	0.0034	0.034	0.016	0.011	0.0015
Microbispora	0.013	0.016	0.72	3.2	1	0.89	0.12	0.95	0.9	0.21	0.97	0.0081	0.43	0.33	0.017	0.014	0.017	0.0049	0.022
Unclassified Chromatiales	0.016	0.019	0.86	3.1	0.98	1	0.03	0.23	1	0.23	0.7	0.094	0.46	0.86	0.038	0.021	0.046	0.011	0.041
Unclassified Pirellulaceae	0.017	0.02	0.9	3	0.31	0.027	0.13	0.92	0.92	1	0.69	0.92	0.12	0.44	0.019	0.032	0.039	0.018	0.0098
Rummeliibacillus	0.017	0.02	0.9	3.1	1	0.058	1	1	0.11	1	1	0.025	0.02	1	0.014	0.00048	0.0095	0.00027	0.23
Moryella	0.02	0.024	1	3	1	0.93	0.2	0.03	1	0.53	0.17	0.7	0.25	0.94	0.013	0.034	0.0088	0.028	0.016
Phascolarctobacterium	0.021	0.025	1	2.9	1	0.69	0.088	1	0.91	0.3	0.98	0.8	0.45	0.019	0.012	0.0076	0.0093	0.026	0.019
Unclassified Deltaproteobacteria	0.022	0.026	1	2.9	0.99	0.38	0.034	0.081	0.77	0.22	0.38	0.88	0.98	0.99	0.024	0.01	0.028	0.0072	0.014
Unclassified Aerococcaceae	0.024	0.028	1	2.8	1	1	0.094	1	1	0.11	1	0.17	1	0.032	0.016	0.016	0.015	0.008	0.015
Akkermansia	0.024	0.028	1	2.9	1	0.99	0.17	0.99	0.98	0.37	0.96	0.064	1	0.022	0.0093	0.0015	0.0066	0.031	0.002
Fusobacterium	0.029	0.034	1	2.7	0.84	0.93	0.15	0.03	1	0.86	0.53	0.61	0.25	0.97	0.76	1.19	0.46	1.04	0.68
Blautia	0.029	0.034	1	2.7	1	0.99	0.037	0.95	1	0.15	1	0.15	1	0.12	0.012	0.019	0.0066	0.055	0.016
Selenomonas	0.033	0.038	1	2.7	1	1	0.98	0.12	1	0.96	0.12	0.94	0.069	0.26	0.0088	0.089	0.016	0.033	0.0087
Unclassified Gemmataceae	0.037	0.043	1	2.6	1	0.47	0.086	0.53	0.38	0.073	0.43	0.94	1	0.79	0.023	0.014	0.022	0.0092	0.013
Unclassified Flavobacteriaceae	0.039	0.045	1	2.5	1	0.95	0.98	0.049	1	1	0.21	1	0.3	0.13	0.011	0.035	0.0068	0.013	0.015
Nitrosopumilus	0.045	0.051	1	2.5	0.71	0.64	0.58	0.93	1	1	0.22	1	0.14	0.089	0.00073	0.063	0.041	0.0011	0.00037
